# Supplementary material for: Serious mental health diagnoses in children on the Child Protection Register: a record linkage study
Source: bioRxiv or medRxiv preprint supplement (doi:10.1101/2023.10.13.23296488), 2023-10-14
Supplement: Supplementary file [file media-1.pdf]

**Table S1** CRediT Statement

| <b>Term</b>                   | <b>Description</b>                                                                                                                                | <b>Authors</b>                                                             |
|-------------------------------|---------------------------------------------------------------------------------------------------------------------------------------------------|----------------------------------------------------------------------------|
| Conceptualization             | <a href="https://credit.niso.org/contributor-roles/conceptualization/">https://credit.niso.org/contributor-roles/conceptualization/</a>           | All authors                                                                |
| Data curation                 | <a href="https://credit.niso.org/contributor-roles/data-curation/">https://credit.niso.org/contributor-roles/data-curation/</a>                   | HR, ML, WB, JB, KO'S on behalf of Grampian<br>DaSH, CA/MM on behalf of ACC |
| Formal analysis               | <a href="https://credit.niso.org/contributor-roles/formal-analysis/">https://credit.niso.org/contributor-roles/formal-analysis/</a>               | WB, JB                                                                     |
| Funding acquisition           | <a href="https://credit.niso.org/contributor-roles/funding-acquisition/">https://credit.niso.org/contributor-roles/funding-acquisition/</a>       | JB, CB, SG                                                                 |
| Investigation                 | <a href="https://credit.niso.org/contributor-roles/investigation/">https://credit.niso.org/contributor-roles/investigation/</a>                   | WB, JB                                                                     |
| Methodology                   | <a href="https://credit.niso.org/contributor-roles/methodology/">https://credit.niso.org/contributor-roles/methodology/</a>                       | WB, JB, CB                                                                 |
| Project administration        | <a href="https://credit.niso.org/contributor-roles/project-administration/">https://credit.niso.org/contributor-roles/project-administration/</a> | JB, CB                                                                     |
| Resources                     | <a href="https://credit.niso.org/contributor-roles/resources/">https://credit.niso.org/contributor-roles/resources/</a>                           | CA, MM, KO'S                                                               |
| Software                      | <a href="https://credit.niso.org/contributor-roles/software/">https://credit.niso.org/contributor-roles/software/</a>                             | WB, JB                                                                     |
| Supervision                   | <a href="https://credit.niso.org/contributor-roles/supervision/">https://credit.niso.org/contributor-roles/supervision/</a>                       | JB, CB, CA, MM                                                             |
| Validation                    | <a href="https://credit.niso.org/contributor-roles/validation/">https://credit.niso.org/contributor-roles/validation/</a>                         | JB, WB                                                                     |
| Visualization                 | <a href="https://credit.niso.org/contributor-roles/visualization/">https://credit.niso.org/contributor-roles/visualization/</a>                   | WB, JB                                                                     |
| Writing – original draft      | <a href="https://credit.niso.org/contributor-roles/writing-original-draft/">https://credit.niso.org/contributor-roles/writing-original-draft/</a> | WB                                                                         |
| Writing – review & editing    | <a href="https://credit.niso.org/contributor-roles/writing-review-editing/">https://credit.niso.org/contributor-roles/writing-review-editing/</a> | All authors                                                                |
| Patient and Public Engagement |                                                                                                                                                   | MRD, SG, BO, WB, JB                                                        |

| <b>Author</b>           | <b>Initials</b> |
|-------------------------|-----------------|
| William P Ball          | WB              |
| Caroline Anderson       | CA              |
| Corri Black             | CB              |
| Sharon Gordon           | SG              |
| Michael Lackenby        | ML              |
| Martin Murchie          | MM              |
| Bārbala Ostrovska       | BO              |
| Katherine O'Sullivan    | KO'S            |
| Helen Rowlands          | HR              |
| Magdalena Rzewuska Díaz | MRD             |
| Jessica E Butler        | JB              |
